# Supplementary material for: Event-related potentials reveal incongruent behavior of autonomous vehicles in the moral machine dilemma
Source: Springer Nature journal article supplement (doi:10.1038/s41598-025-99531-6), 2025-05-08
Supplement: MOESM1 [file 41598_2025_99531_MOESM1_ESM.pdf]

# Supplementary Material to "Event-Related Potentials Reveal Incongruent Behavior of Autonomous Vehicles in the Moral Machine Dilemma"

Maren A. K. Bertheau<sup>1,2</sup>, Cindy Boetzel<sup>1</sup>, and Christoph S. Herrmann<sup>1,3,4,\*</sup>

<sup>1</sup>Department of Psychology, Experimental Psychology Lab, Carl-von-Ossietzky University, Ammerländer Heerstr. 114-118, 26111 Oldenburg, Germany

<sup>2</sup>Department of Informatics, Karlsruhe Institute of Technology (KIT), Am Fasanengarten 5, 76131 Karlsruhe, Germany

<sup>3</sup>European Medical School, Cluster for Excellence "Hearing for All", Research Center Neurosensory Science, Carl-von-Ossietzky University, Carl-von-Ossietzky-Straße 9-11, 26129 Oldenburg, Germany

<sup>4</sup>Research Center Neurosensory Science, Carl von Ossietzky University, 26129 Oldenburg, Germany

\*christoph.herrmann@uni-oldenburg.de

## ABSTRACT

This supplementary material contains further details on Results and Methods for the study "Event-related potentials (ERPs) reveal incongruent behavior of autonomous vehicles (AVs) in the Moral Machine (MM) dilemma".

Regarding Results we supplement the complete tables on the behavioral t-tests (see Table 1), the two two-way analysis of variance (ANOVAs) for the components 'P3' (see Table 2), and 'late positive potential (LPP)' (see Table 3), as well as the corresponding post hoc procedures for those effects which showed to be significant in the ANOVAs (see Tables 4-6).

Regarding Methods we give a complete Character Atlas from the MM stimulus material (see Fig. 1), further details on technical equipment, the used question items, and the statistical power estimation.

## Results

| Dependent variable           | A                 | B              | Mean    |        | Difference between means |                         |                     | degrees of freedom (df) | T      | Significance |         | Effect Cohen's d |
|------------------------------|-------------------|----------------|---------|--------|--------------------------|-------------------------|---------------------|-------------------------|--------|--------------|---------|------------------|
|                              |                   |                | A       | B      | A-B                      | standard deviation (SD) | standard error (SE) |                         |        | two-sided p  | p*(C=4) |                  |
| No. arrows pressed           | Inaction (left) - | Action (right) | 102.650 | 97.150 | 5.500                    | 34.353                  | 5.892               | 33                      | .934   | .357         | >.1     | .160             |
| No. AVs with passengers      | Sacrificed -      | Spared         | 86.820  | 47.059 | 39.765                   | 48.705                  | 8.353               | 33                      | 4.761  | <.001        | <.001   | .816             |
| Mean No. of characters       | Spared -          | Sacrificed     | 3.590   | 2.409  | 1.180                    | .380                    | .065                | 33                      | 18.134 | <.001        | <.001   | 3.110            |
| Species: pets                | Sacrificed -      | Spared         | 41.471  | 36.471 | 5.000                    | 7.954                   | 1.364               | 33                      | 3.665  | <.001        | .003    | .629             |
| Acceptability (Likert [1,7]) | congruent -       | incongruent    | 5.744   | 2.541  | 3.203                    | .978                    | .168                | 33                      | 19.095 | <.001        |         | 3.275            |

**Supplementary Table 1** behavioral t-Test results from the MM task with Bonferroni correction with C=4 relevant comparisons.

| factor                      | sphericity correction   | square sum | df     | MSS      | F      | p     | partial $\eta^2$ |
|-----------------------------|-------------------------|------------|--------|----------|--------|-------|------------------|
| Condition                   | -                       | 40.418     | 1      | 40.418   | 9.887  | .004  | .231             |
| error(Condition)            | -                       | 134.903    | 33     | 4.088    |        |       |                  |
| Electrodes                  | -                       | 1828.809   | 2      | 914.404  | 98.464 | <.001 | .749             |
|                             | Greenhouse-Geisser (GG) | 1828.809   | 1.220  | 1498.724 | 98.464 | <.001 | .749             |
| error(Electrodes)           | -                       | 612.920    | 66     | 9.287    |        |       |                  |
|                             | GG                      | 612.920    | 40.268 | 15.221   |        |       |                  |
| Condition * Electrodes      | -                       | 7.228      | 2      | 3.614    | 18.641 | <.001 | .361             |
|                             | GG                      | 7.228      | 1.454  | 4.971    | 18.641 | <.001 | .361             |
| error(Condition*Electrodes) | -                       | 12.796     | 66     | .194     |        |       |                  |
|                             | GG                      | 12.796     | 47.986 | .267     |        |       |                  |

**Supplementary Table 2** Two-way ANOVA for P3 component with GG correction.

| factor                      | sphericity correction | square sum | df     | MSS     | F      | p               | partial $\eta^2$ |
|-----------------------------|-----------------------|------------|--------|---------|--------|-----------------|------------------|
| Condition                   | -                     | 161.623    | 1      | 161.623 | 24.658 | <b>&lt;.001</b> | <b>.428</b>      |
| error(Condition)            | -                     | 216.300    | 33     | 6.555   |        |                 |                  |
| Electrodes                  | -                     | 809.371    | 2      | 404.686 | 80.168 | <.001           | .708             |
|                             | GG                    | 809.371    | 1.135  | 713.043 | 80.168 | <b>&lt;.001</b> | <b>.708</b>      |
| error(Electrodes)           | -                     | 333.166    | 66     | 5.048   |        |                 |                  |
|                             | GG                    | 333.166    | 37.458 | 8.894   |        |                 |                  |
| Condition * Electrodes      | -                     | 1.522      | 2      | .761    | 1.609  | .208            | .046             |
|                             | GG                    | 1.522      | 1.210  | 1.257   | 1.609  | .215            | .046             |
| error(Condition*Electrodes) | -                     | 31.217     | 66     | .473    |        |                 |                  |
|                             | GG                    | 31.217     | 39.945 | .782    |        |                 |                  |

**Supplementary Table 3** Two-way ANOVA for LPP component with GG correction.

| simple main effect |          | diff. between means | SD    | SE   | 95% confidence interval for difference |             | T       | df | significance |             | effect          |               |
|--------------------|----------|---------------------|-------|------|----------------------------------------|-------------|---------|----|--------------|-------------|-----------------|---------------|
|                    |          |                     |       |      | lower bound                            | upper bound |         |    | one sided p  | two sided p | p*(C=12)        | Cohen's d     |
| frontal -          | central  | -3.072              | 2.017 | .346 | -3.776                                 | -2.368      | -8.883  | 33 | <.001        | <.001       | <b>&lt;.001</b> | <b>-1.523</b> |
| frontal -          | parietal | -7.303              | 4.058 | .696 | -8.719                                 | -5.888      | -10.494 | 33 | <.001        | <.001       | <b>&lt;.001</b> | <b>-1.800</b> |
| central -          | parietal | -4.231              | 2.707 | .464 | -5.176                                 | -3.287      | -9.116  | 33 | <.001        | <.001       | <b>&lt;.001</b> | <b>-1.563</b> |

**Supplementary Table 4** Bonferroni corrected t-tests with C= 12 relevant comparisons as post hoc procedure for the three level main effect Electrodes at the component P3.

| factor   | simple main effect |           | diff. between means | SD    | SE   | 95% confidence interval for difference |             | T       | df | significance |             | effect          |               |
|----------|--------------------|-----------|---------------------|-------|------|----------------------------------------|-------------|---------|----|--------------|-------------|-----------------|---------------|
|          |                    |           |                     |       |      | lower bound                            | upper bound |         |    | one sided p  | two sided p | p*(C=12)        | Cohen's d     |
| frontal  | (inc -             | con)      | 1.187               | 1.485 | .255 | .669                                   | 1.705       | 4.663   | 33 | <.001        | <.001       | <b>.001</b>     | <b>.800</b>   |
| central  | (inc -             | con)      | 1.124               | 1.791 | .307 | .499                                   | 1.749       | 3.661   | 33 | <.001        | .001        | <b>.010</b>     | <b>.628</b>   |
| parietal | (inc -             | con)      | .359                | 1.882 | .323 | -.297                                  | 1.016       | 1.113   | 33 | .137         | .274        | 3.287           | .191          |
| con      | (frontal -         | central)  | -3.104              | 1.881 | .323 | -3.760                                 | -2.447      | -9.620  | 33 | <.001        | <.001       | <b>&lt;.001</b> | <b>-1.650</b> |
| con      | (frontal -         | parietal) | -7.718              | 3.824 | .656 | -9.052                                 | -6.383      | -11.768 | 33 | <.001        | <.001       | <b>&lt;.001</b> | <b>-2.018</b> |
| con      | (central -         | parietal) | -4.614              | 2.614 | .448 | -5.526                                 | -3.702      | -10.292 | 33 | <.001        | <.001       | <b>&lt;.001</b> | <b>-1.765</b> |
| inc      | (frontal -         | central)  | -3.040              | 2.212 | .379 | -3.812                                 | -2.269      | -8.015  | 33 | <.001        | <.001       | <b>&lt;.001</b> | <b>-1.375</b> |
| inc      | (frontal -         | parietal) | -6.889              | 4.351 | .746 | -8.408                                 | -5.371      | -9.232  | 33 | <.001        | <.001       | <b>&lt;.001</b> | <b>-1.583</b> |
| inc      | (central -         | parietal) | -3.849              | 2.839 | .487 | -4.839                                 | -2.858      | -7.905  | 33 | <.001        | <.001       | <b>&lt;.001</b> | <b>-1.356</b> |

**Supplementary Table 5** Bonferroni corrected t-tests with C= 12 relevant comparisons as post hoc procedure for the interaction effect Electrodes x Condition at the component P3.

| simple main effect |          | diff. between means | SD    | SE   | 95% confidence interval for difference |             | T      | df | significance |             | effect          |               |
|--------------------|----------|---------------------|-------|------|----------------------------------------|-------------|--------|----|--------------|-------------|-----------------|---------------|
|                    |          |                     |       |      | lower bound                            | upper bound |        |    | one sided p  | two sided p | p*(C=3)         | Cohen's d     |
| frontal -          | central  | -2.333              | 1.393 | .239 | -2.819                                 | -1.846      | -9.761 | 33 | <.001        | <.001       | <b>&lt;.001</b> | <b>-1.674</b> |
| frontal -          | parietal | -4.878              | 3.051 | .523 | -5.942                                 | -3.813      | -9.322 | 33 | <.001        | <.001       | <b>&lt;.001</b> | <b>-1.599</b> |
| central -          | parietal | -2.545              | 1.973 | .338 | -3.233                                 | -1.856      | -7.519 | 33 | <.001        | <.001       | <b>&lt;.001</b> | <b>-1.290</b> |

**Supplementary Table 6** Bonferroni corrected t-tests with C= 3 relevant comparisons as post hoc procedure for the three level main effect Electrodes at the component LPP.

## Methods

### Photo Diode Field

We used a photo sensor (Brain Products Gilchingen, Germany) field in the lower left corner of the screen to acquire a ground truth verification of our set up's timing: Simultaneously to the onset of our stimuli, their appearance on the screen, the photo sensor field flipped from grey to white for 100 ms. By comparing these time stamps the to the electroencephalography

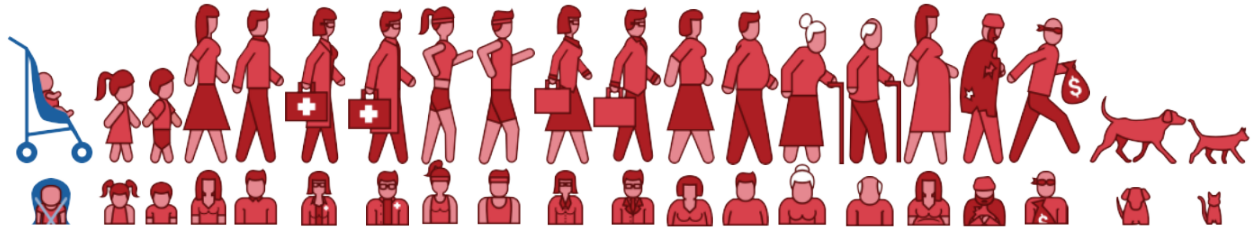

**Supplementary Fig. 1** Complete set of 20 characters as pedestrians (top) and passengers (bottom) in the MM task. They differ in sex (female, male), age (baby, child, grown up, elderly), species (human, pet), fitness level (large, fit), and social status (homeless, executive).

(EEG)-triggers we archived an even more precise timing.

### Exact Wording of Acceptability Item

German: 'Wie akzeptabel fanden Sie das Verhalten des selbst-fahrenden Fahrzeugs?

völlig unakzeptabel 1 - 2 - 3 - 4 - 5 - 6 - 7 völlig akzeptabel'

English: 'How acceptable did you find the behavior of the self-driving vehicle?

completely unacceptable 1 - 2 - 3 - 4 - 5 - 6 - 7 completely acceptable'

### Statistical Power Estimation

G\*power Version 3 [1, 2] does not allow for power estimations of ANOVAs with repeated measures on two factors [3]. To evade this we adjusted the effect sizes  $f$  according to the method suggested by Rasch, Frieze, Hofmann & Naumann [3] (Chapter 3.3). For two-factor ANOVAs, they suggest adjusting  $f$  based on the other factor:  $f' = \sqrt{q} * f$  or  $f' = \sqrt{p} * f$ , respectively. Statistical power ( $1 - \beta$ ) estimations were carried out for all three effects of the 2x3 ANOVA *Condition x Electrodes* with 34 complete datasets, and a conservatively assumed correlation between repeated measures of  $r = .2$ . We employed the effect conventions suggested by G\*Power: small ( $f = 0.10$ ), medium ( $f = 0.25$ ), and large ( $f = 0.40$ ). For the main effect *Condition* (congruent, incongruent:  $p = 2$ ) we employed the following adjustment  $f' = \sqrt{q} * f$  to G\*Power and found:

- small:  $f' = \sqrt{3} * 0.1 = 0.173, \lambda = 2.550, 1 - \beta = 0.341$
- medium:  $f' = \sqrt{3} * 0.25 = 0.433, \lambda = 15.937, 1 - \beta = 0.972$
- large:  $f' = \sqrt{3} * 0.4 = 0.693, \lambda = 40.798, 1 - \beta = 0.999$

For the main effect *Electrodes* (frontal, central, parietal:  $q = 3$ ) and the interaction *Condition x Electrodes* we employed the following adjustment  $f' = \sqrt{p} * f$  to G\*Power and found:

- small:  $f' = \sqrt{2} * 0.1 = 0.141, \lambda = 2.549, 1 - \beta = 0.267$
- medium:  $f' = \sqrt{2} * 0.25 = 0.354, \lambda = 15.942, 1 - \beta = 0.947$
- large:  $f' = \sqrt{2} * 0.4 = 0.566, \lambda = 40.802, 1 - \beta = 0.999$

Thus, overall we at least achieved statistical power of  $1 - \beta = 0.947$  for the three ANOVA effects assuming a conventionally medium sized effect.

### References

1. Faul, F., Erdfelder, E., Lang, A.-G. & Buchner, A. G\*Power 3: A flexible statistical power analysis program for the social, behavioral, and biomedical sciences. *Behavior Research Methods* **39**, 175–191 (2007).
2. Faul, F., Erdfelder, E., Buchner, A. & Lang, A.-G. Statistical power analyses using G\*Power 3.1: Tests for correlation and regression analyses. *Behavior Research Methods* **41**, 1149–1160 (2009).
3. Rasch, B., Frieze, M., Hofmann, W. & Naumann, E. *Quantitative Methoden. Band 2* 5th ed. Supplementary material retrieved from [https://www.lehrbuch-psychologie.springernature.com/sites/default/files/2022-01/Rasch\\_A5\\_978-3-662-63283-3\\_Kapitel\\_3\\_GPower\\_R\\_Ergaenzung.pdf](https://www.lehrbuch-psychologie.springernature.com/sites/default/files/2022-01/Rasch_A5_978-3-662-63283-3_Kapitel_3_GPower_R_Ergaenzung.pdf) (Springer, Heidelberg, 2021).
